# Supplementary material for: Hydrophobically modified PEGylated glycol chitosan nanoparticles: synthesis, characterisation and anticancer properties
Source: Royal Society of Chemistry journal article supplement (doi:10.1039/d1nj01710a), 2021-01-01
Supplement: d1nj01710a1.pdf [file d1nj01710a1.pdf]

### Electronic Supplementary Information (ESI)

Title : Hydrophobically modified PEGylated glycol chitosan nanoparticles: Synthesis, characterisation and anticancer property

Authors : Wai Mun Chong, Vuanghao Lim and Erazuliana Abd Kadir

Journal : New Journal of Chemistry

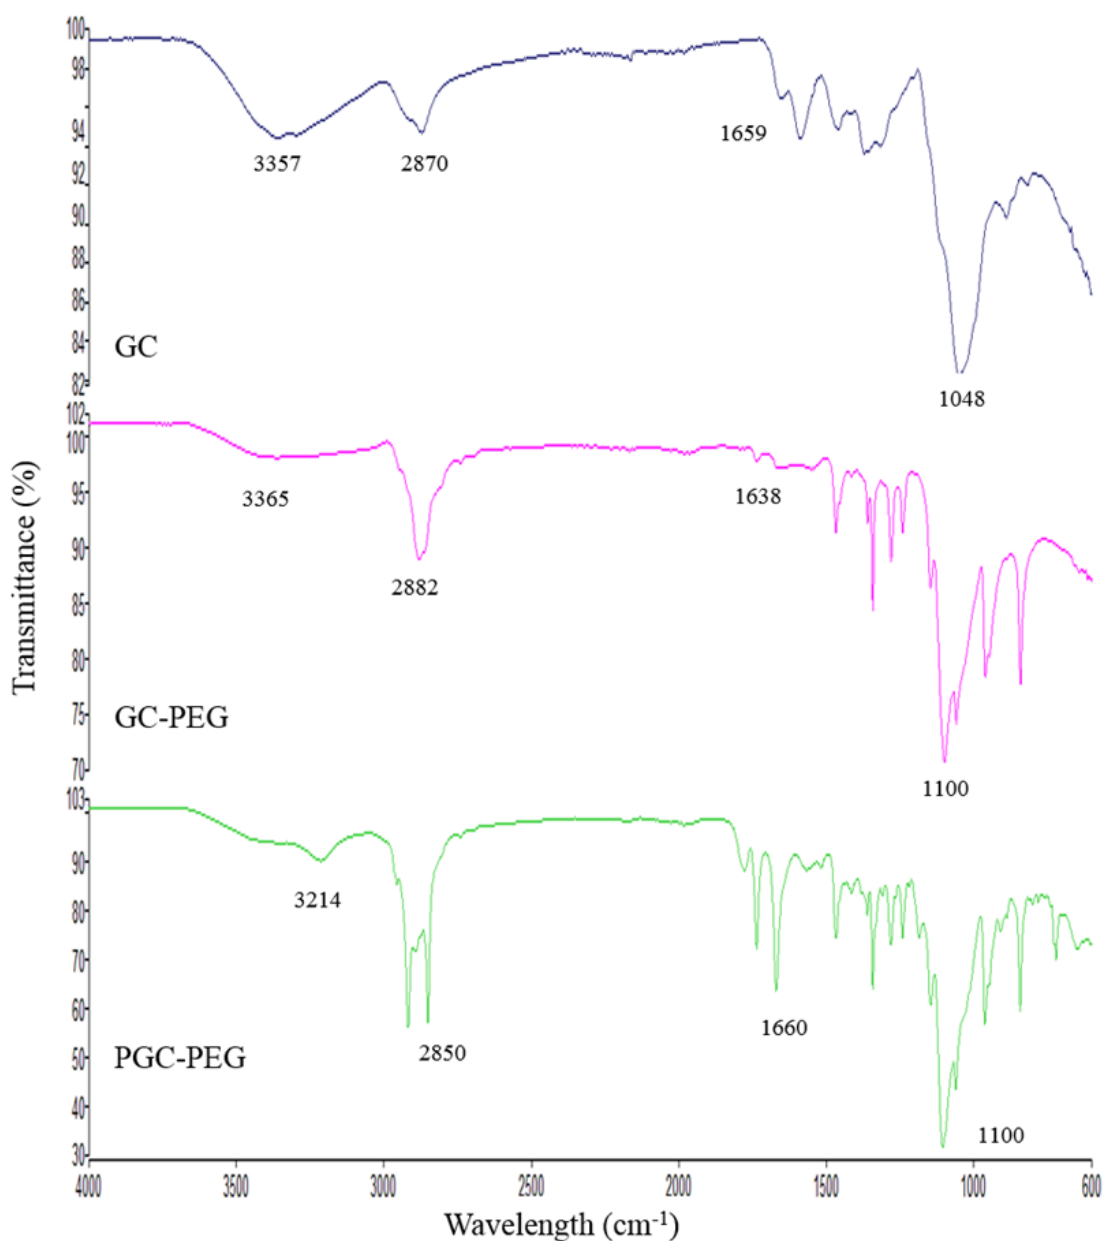

Figure S1: FTIR spectra of GC, GC-PEG and PGC-PEG.

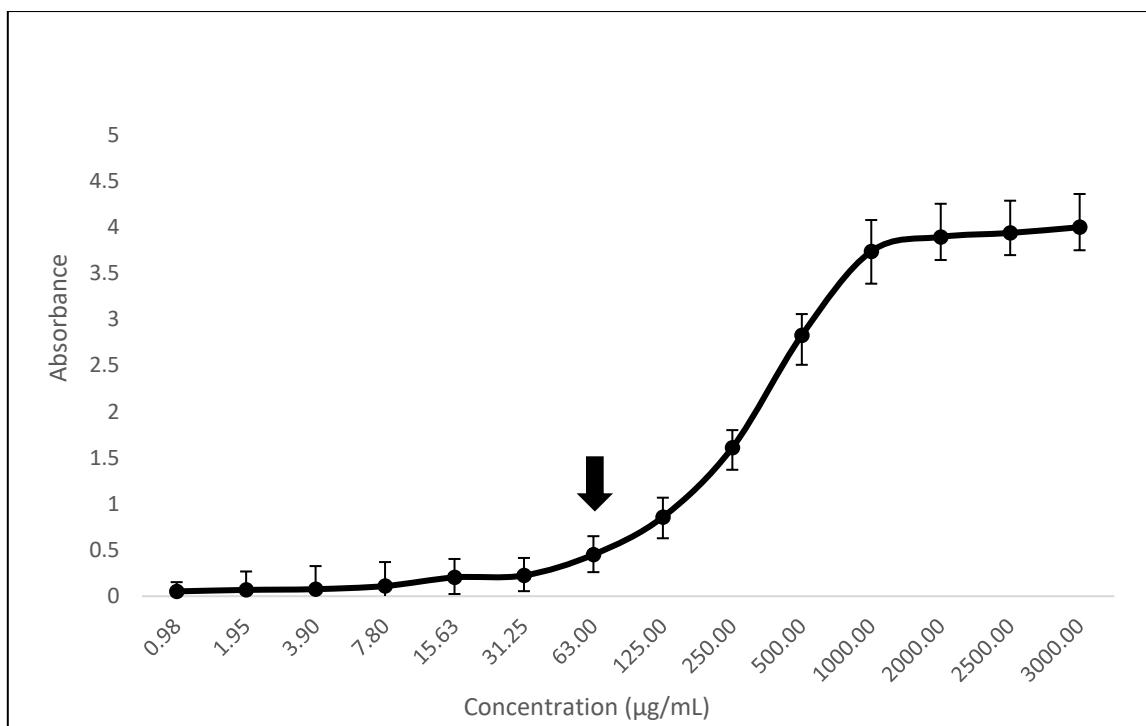

Figure S2: The sigmoidal curve represents the absorbance against PGC-PEG concentrations. The arrow shows the CMC value of PGC-PEG at 63 µg/ml.

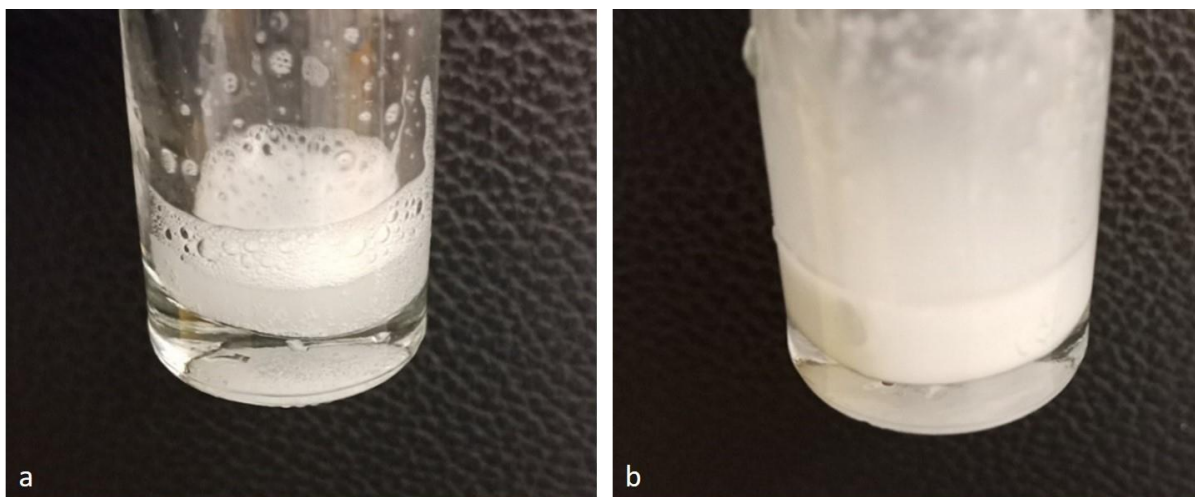

Figure S3: The PMs (a) appeared as a cloudy suspension whereas the NEs (b) appeared as a milky-white emulsion.

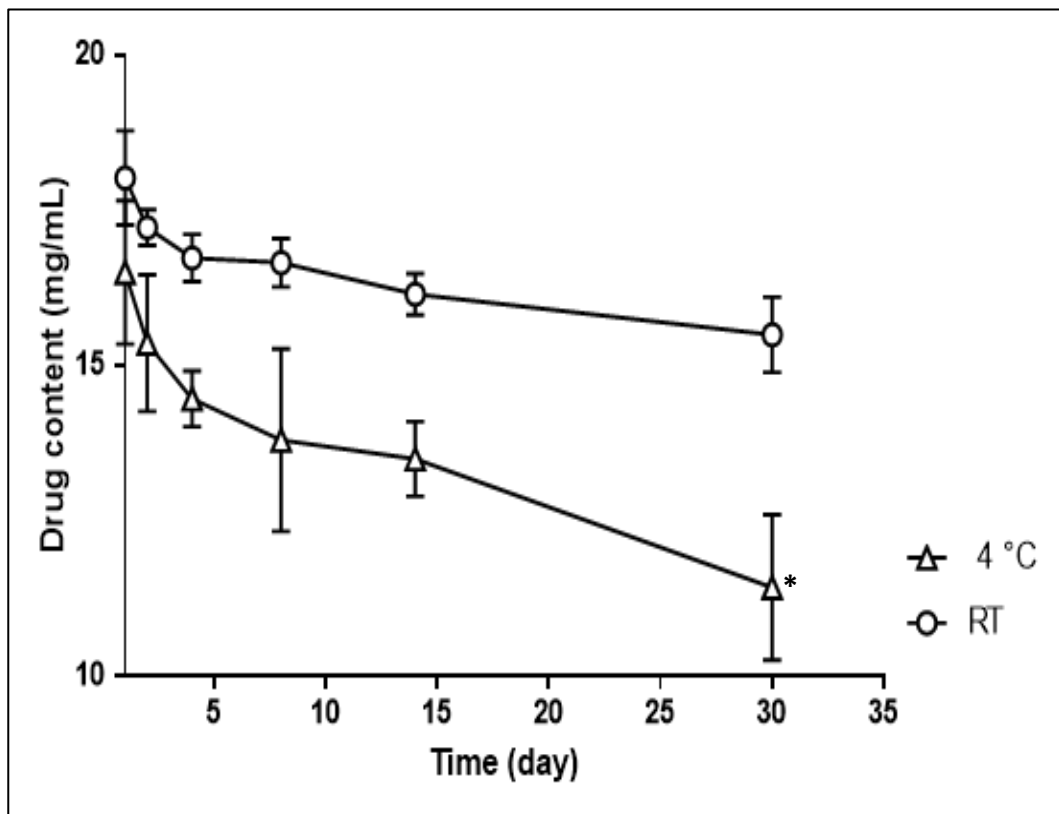

Figure S4: Amount of ITZ detected in olive oil is shown for Day 1, 2, 4, 8, 14 and 30 (mean± SD, n=3). \*Significant compared to drug content on Day 1 (p<0.05).

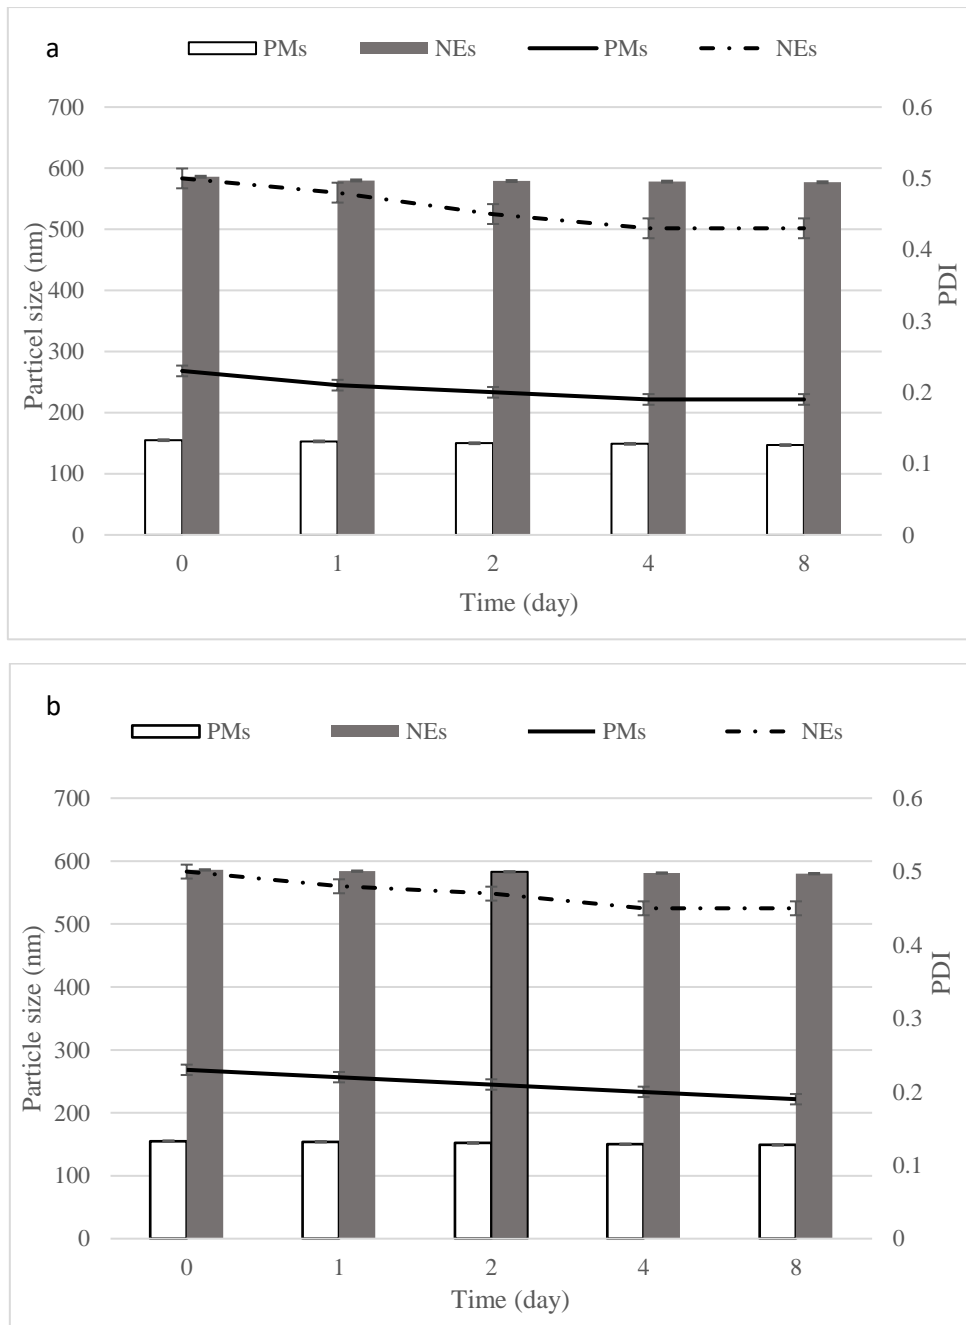

Figure S5: Bar graph represents the particle size and line graph represents the PDI values of PMs and NEs at (a) RT and (b) 4°C (mean  $\pm$  SD, n = 3).
